# Supplementary material for: Perfectly planar concentric π-aromatic B18H3−, B18H4, B18H5+, and B18H62+ with [10]annulene character
Source: Royal Society of Chemistry journal article supplement (doi:10.1039/c1cp21927h), 2011-01-01
Supplement: c1cp21927h.pdf [file c1cp21927h.pdf]

# Perfectly Concentric Planar $\pi$ -Aromatic $B_{18}H_3^-$ , $B_{18}H_4$ , $B_{18}H_5^+$ , and $B_{18}H_6^{2+}$ : Inorganic Analogues of [10]Annulene

Qiang Chen, Hui Bai, Jin-Chang Guo, Chang-Qing Miao, and Si-Dian Li\*

*Institute of Molecular Sciences, Shanxi University, Taiyuan 030006, People's Republic of China, and  
Institute of Materials Science and Department of Chemistry, Xinzhou Teachers' University, Xinzhou  
034000, Shanxi, People's Republic of China. E-mail: [lisidian@yahoo.com](mailto:lisidian@yahoo.com)*

## Supplementary Information

**Fig.1S** Low-lying isomers obtained for concerned borannulenes and their cations and anions with relative energies indicated in kcal/mol at B3LYP/6-311G(d,p) and {CCSD(T)//B3LYP}

**1. B<sub>18</sub> neutral**

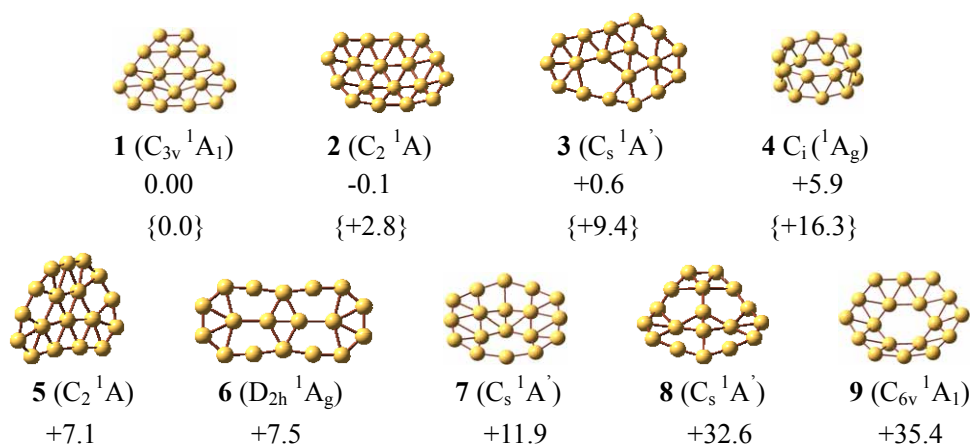

**2. B<sub>18</sub>H<sub>2</sub> neutral**

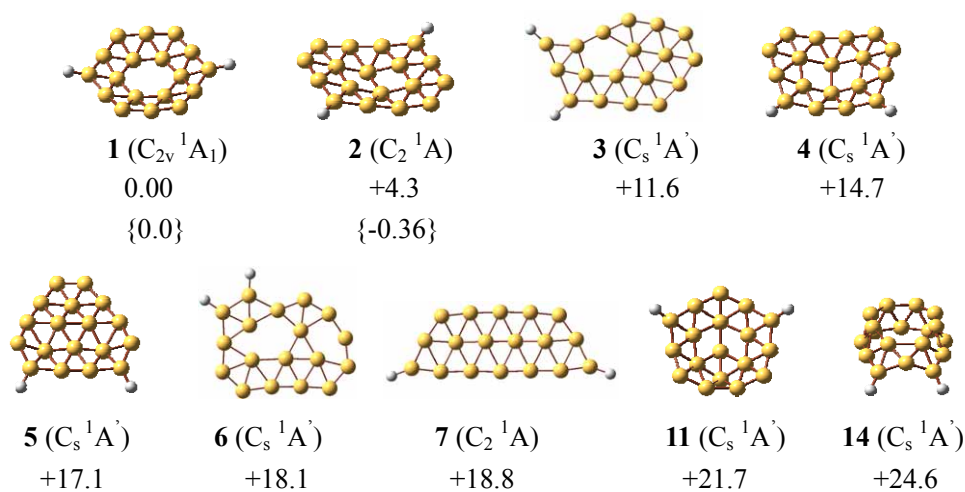

### 3. B<sub>18</sub>H<sub>3</sub><sup>-</sup> anion

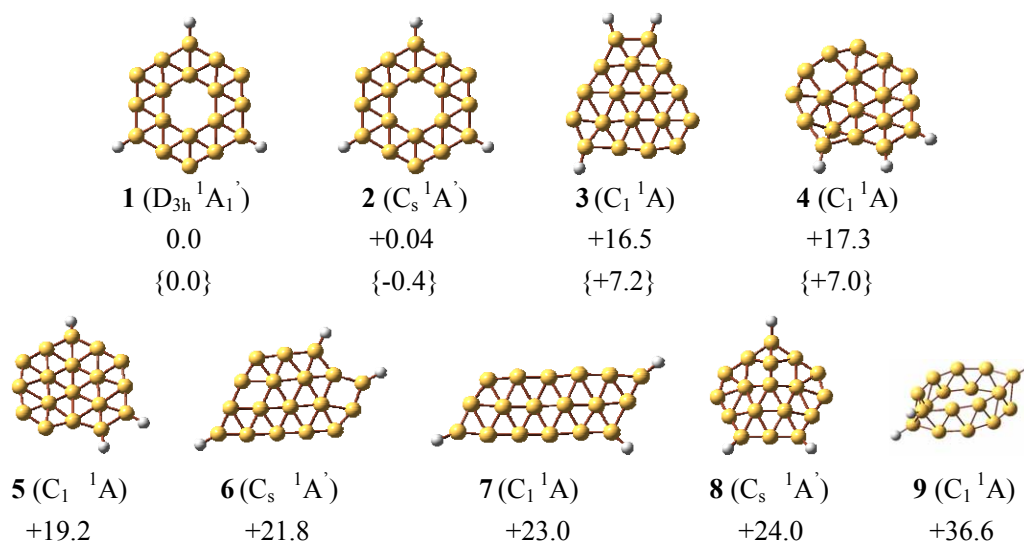

### 4. B<sub>18</sub>H<sub>4</sub> neutral

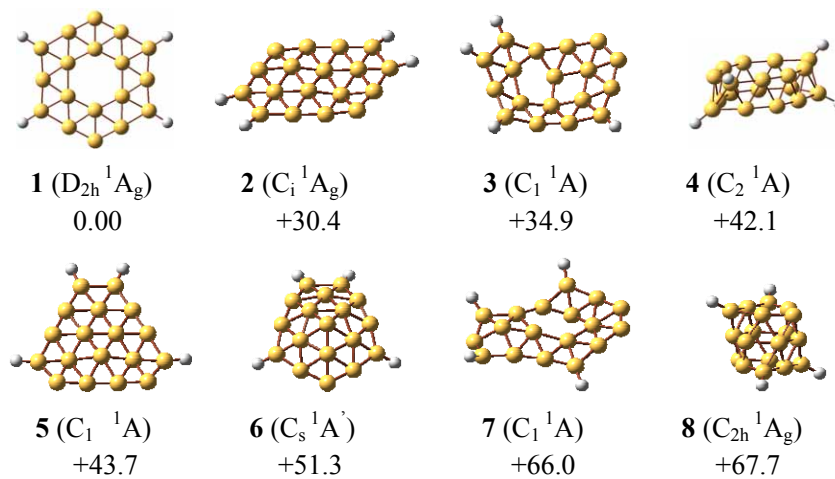

## 5. $B_{18}H_4^-$ anion

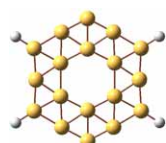

**1** ( $D_{2h}^2 B_{2g}$ )  
0.0

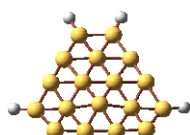

**2** ( $C_1^2 A$ )  
+19.9

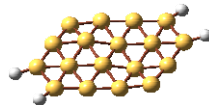

**3** ( $C_i^2 A_g$ )  
+24.1

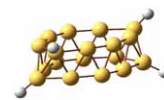

**4** ( $C_2^2 A$ )  
+30.8

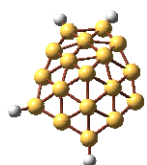

**5** ( $C_1^2 A$ )  
+33.7

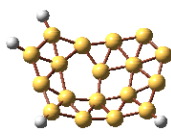

**6** ( $C_1^2 A$ )  
+34.8

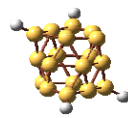

**7** ( $C_{2h}^2 A$ )  
+56.7

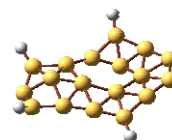

**8** ( $C_1^2 A$ )  
+61.5

## 6. $B_{18}H_5^+$ cation

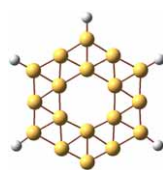

**1** ( $C_{2v}^1 A_1$ )  
0.0

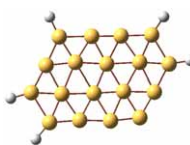

**2** ( $C_1^1 A$ )  
+26.7

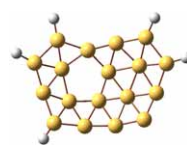

**3** ( $C_1^1 A$ )  
+35.0

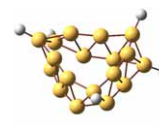

**4** ( $C_1^1 A$ )  
+37.1

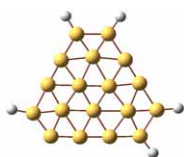

**5** ( $C_1^1 A$ )  
+49.0

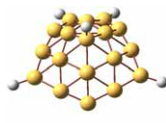

**6** ( $C_s^1 A'$ )  
+53.0

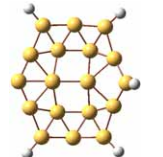

**7** ( $C_s^1 A'$ )  
+56.3

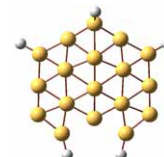

**8** ( $C_s^1 A'$ )  
+56.4

## 7. $B_{18}H_6^{2+}$ dication

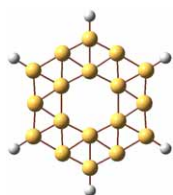

**1** ( $D_{6h}^1 A_g$ )  
0.0

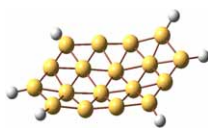

**2** ( $C_{2v}^1 A$ )  
+51.3

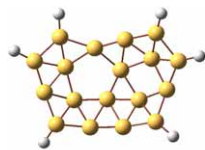

**3** ( $C_{1v}^1 A$ )  
+53.1

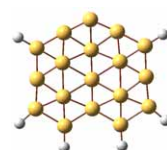

**4** ( $C_s^1 A'$ )  
+57.0

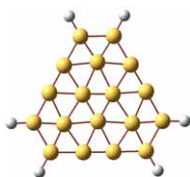

**5** ( $D_{3h}^3 A_1'$ )  
+66.0

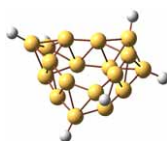

**6** ( $C_{2v}^1 A$ )  
+80.6

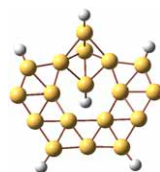

**7** ( $C_s^1 A'$ )  
+88.3

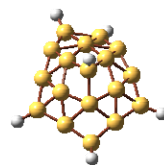

**8** ( $C_{1v}^1 A$ )  
+95.0

## 8. $B_{18}H_6$ neutral

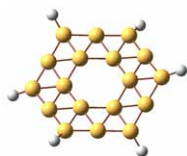

**1** ( $D_{3d}^1 A_g$ )  
0.0  
{0.0}

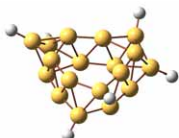

**2** ( $D_3^1 A_1$ )  
+0.6  
{-29.5}

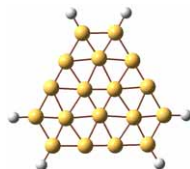

**3** ( $D_{3h}^1 A_1'$ )  
+11.4  
{+3.2}

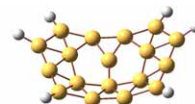

**4** ( $C_s^1 A'$ )  
+18.3  
{+14.1}

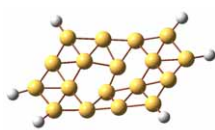

**5** ( $C_{2v}^1 A$ )  
+19.1

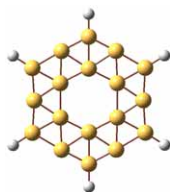

**6** ( $D_{6h}^1 A_{1g}$ )  
+19.3

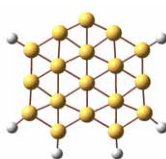

**7** ( $C_{2v}^1 A_1$ )  
+30.1

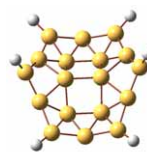

**8** ( $C_{2v}^1 A_1$ )  
+35.9

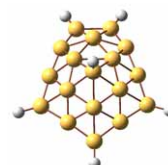

**9** ( $C_s^1 A'$ )  
+36.2

**Fig.2S** Optimized bond lengths and Cartesian coordinates (x, y, z) in Å  
for  $D_{3h}$   $B_{18}H_3^-$  (**6**) (a),  $C_s$   $B_{18}H_3^-$  (**15**) (b),  $D_{2h}$   $B_{18}H_4$  (**8**) (c),  $C_{2v}$   $B_{18}H_5^+$  (**10**)  
(d), and  $D_{6h}$   $B_{18}H_6^{2+}$  (**12**) (e) at B3LYP/6-311(d,p)

(a).  $D_{3h}$   $B_{18}H_3^-$

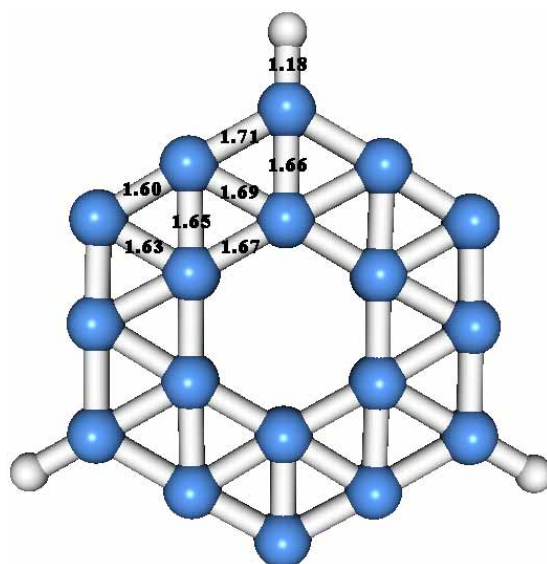

| Atomic Number | X         | Y         | Z        |
|---------------|-----------|-----------|----------|
| 5             | 2.849859  | -1.645367 | 0.000000 |
| 5             | 0.000000  | 1.661666  | 0.000000 |
| 5             | -1.439045 | -0.830833 | 0.000000 |
| 5             | 1.439045  | -0.830833 | 0.000000 |
| 5             | 1.446921  | 0.835380  | 0.000000 |
| 5             | 0.000000  | -1.670760 | 0.000000 |
| 5             | 1.483335  | -2.479969 | 0.000000 |
| 5             | 0.000000  | -3.329809 | 0.000000 |
| 5             | -1.446921 | 0.835380  | 0.000000 |
| 5             | 2.883700  | 1.664905  | 0.000000 |
| 5             | 2.889384  | -0.044621 | 0.000000 |
| 5             | 0.000000  | 3.290734  | 0.000000 |
| 5             | 1.406049  | 2.524591  | 0.000000 |
| 5             | -1.483335 | -2.479969 | 0.000000 |
| 5             | -2.849859 | -1.645367 | 0.000000 |
| 5             | -2.883700 | 1.664905  | 0.000000 |
| 5             | -1.406049 | 2.524591  | 0.000000 |
| 5             | -2.889384 | -0.044621 | 0.000000 |
| 1             | 3.908170  | 2.256383  | 0.000000 |
| 1             | -3.908170 | 2.256383  | 0.000000 |
| 1             | 0.000000  | -4.512767 | 0.000000 |

(b).  $C_s B_{18}H_3^-$

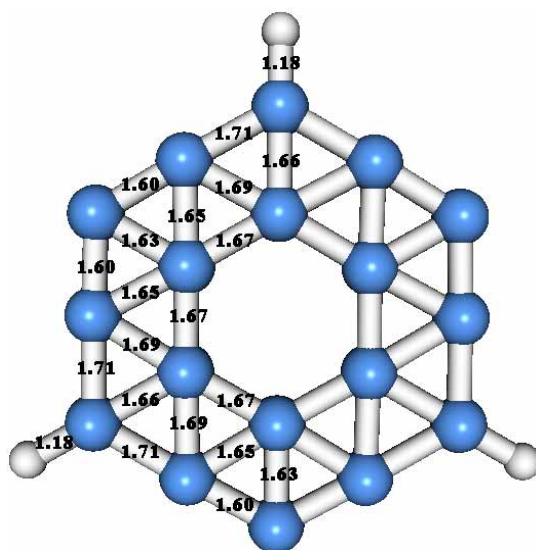

| Atomic Number | X         | Y         | Z         |
|---------------|-----------|-----------|-----------|
| 5             | 1.642246  | -0.083572 | 2.842072  |
| 5             | -1.659108 | -0.105255 | 0.000000  |
| 5             | 0.827271  | 0.112662  | -1.442326 |
| 5             | 0.827271  | 0.112662  | 1.442326  |
| 5             | -0.833315 | -0.021029 | 1.445457  |
| 5             | 1.669348  | 0.157897  | 0.000000  |
| 5             | 2.474950  | 0.012028  | 1.479902  |
| 5             | 3.322459  | -0.010958 | 0.000000  |
| 5             | -0.833315 | -0.021029 | -1.445457 |
| 5             | -1.663039 | -0.028537 | 2.882733  |
| 5             | 0.045810  | -0.067540 | 2.887402  |
| 5             | -3.279700 | 0.087593  | 0.000000  |
| 5             | -2.519456 | 0.029595  | 1.404963  |
| 5             | 2.474950  | 0.012028  | -1.479902 |
| 5             | 1.642246  | -0.083572 | -2.842072 |
| 5             | -1.663039 | -0.028537 | -2.882733 |
| 5             | -2.519456 | 0.029595  | -1.404963 |
| 5             | 0.045810  | -0.067540 | -2.887402 |
| 1             | -2.255773 | -0.038342 | -3.906448 |
| 1             | -2.255773 | -0.038342 | 3.906448  |
| 1             | 4.501878  | -0.105764 | 0.000000  |

(c).  $D_{2h}$   $B_{18}H_4$

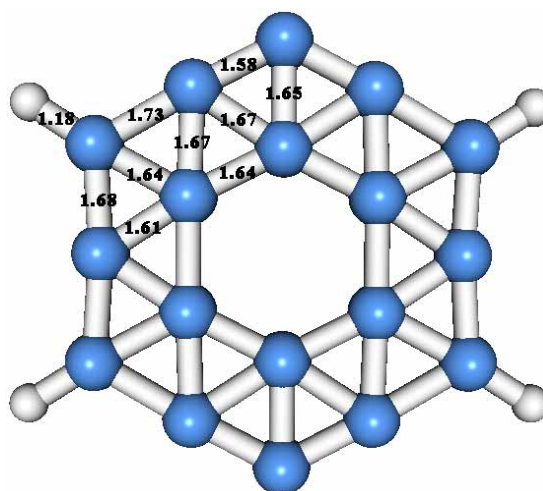

| Atomic Number | X        | Y         | Z         |
|---------------|----------|-----------|-----------|
| 5             | 0.000000 | 2.893649  | 1.677953  |
| 5             | 0.000000 | 0.000000  | -1.641631 |
| 5             | 0.000000 | -1.459833 | 0.890745  |
| 5             | 0.000000 | 1.459833  | 0.890745  |
| 5             | 0.000000 | 1.459833  | -0.890745 |
| 5             | 0.000000 | 0.000000  | 1.641631  |
| 5             | 0.000000 | 1.398446  | 2.556769  |
| 5             | 0.000000 | 0.000000  | 3.293392  |
| 5             | 0.000000 | -1.459833 | -0.890745 |
| 5             | 0.000000 | 2.893649  | -1.677953 |
| 5             | 0.000000 | 2.798093  | 0.000000  |
| 5             | 0.000000 | 0.000000  | -3.293392 |
| 5             | 0.000000 | 1.398446  | -2.556769 |
| 5             | 0.000000 | -1.398446 | 2.556769  |
| 5             | 0.000000 | -2.893649 | 1.677953  |
| 5             | 0.000000 | -2.893649 | -1.677953 |
| 5             | 0.000000 | -1.398446 | -2.556769 |
| 5             | 0.000000 | -2.798093 | 0.000000  |
| 1             | 0.000000 | 3.885759  | 2.314344  |
| 1             | 0.000000 | -3.885759 | -2.314344 |
| 1             | 0.000000 | -3.885759 | 2.314344  |
| 1             | 0.000000 | 3.885759  | -2.314344 |



(d).  $C_{2v}$   $B_{18}H_5^+$

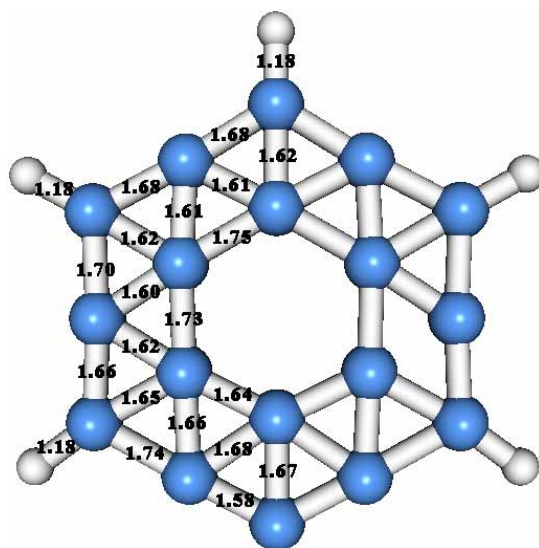

| Atomic Number | X        | Y         | Z         |
|---------------|----------|-----------|-----------|
| 5             | 0.000000 | 2.918520  | 1.635312  |
| 5             | 0.000000 | 0.000000  | -1.642004 |
| 5             | 0.000000 | -1.518640 | 0.811666  |
| 5             | 0.000000 | 1.518640  | 0.811666  |
| 5             | 0.000000 | 1.472409  | -0.922415 |
| 5             | 0.000000 | 0.000000  | 1.687525  |
| 5             | 0.000000 | 1.431287  | 2.420295  |
| 5             | 0.000000 | 0.000000  | 3.305790  |
| 5             | 0.000000 | -1.472409 | -0.922415 |
| 5             | 0.000000 | 2.910763  | -1.726553 |
| 5             | 0.000000 | 2.852469  | -0.065379 |
| 5             | 0.000000 | 0.000000  | -3.312522 |
| 5             | 0.000000 | 1.393389  | -2.577672 |
| 5             | 0.000000 | -1.431287 | 2.420295  |
| 5             | 0.000000 | -2.918520 | 1.635312  |
| 5             | 0.000000 | -2.910763 | -1.726553 |
| 5             | 0.000000 | -1.393389 | -2.577672 |
| 5             | 0.000000 | -2.852469 | -0.065379 |
| 1             | 0.000000 | 3.860367  | -2.423904 |
| 1             | 0.000000 | 3.947925  | 2.208393  |
| 1             | 0.000000 | -3.860367 | -2.423904 |
| 1             | 0.000000 | -3.947925 | 2.208393  |
| 1             | 0.000000 | 0.000000  | 4.484533  |

(e).  $D_{6h}$   $B_{18}H_6^{2+}$

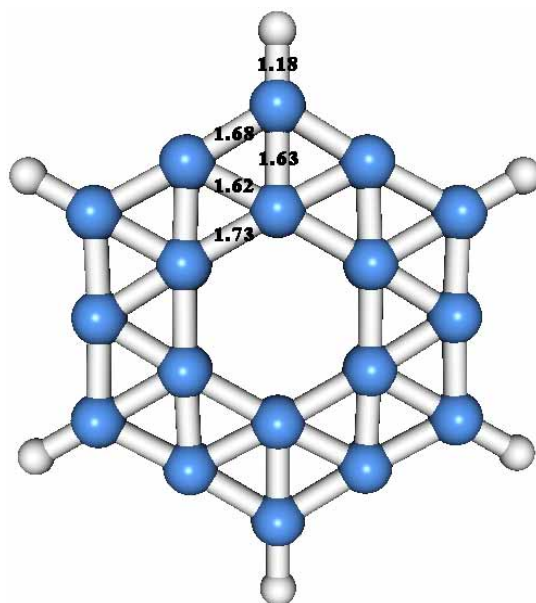

| Atomic Number | X         | Y         | Z        |
|---------------|-----------|-----------|----------|
| 5             | 2.911626  | -1.681028 | 0.000000 |
| 5             | 0.000000  | 1.731901  | 0.000000 |
| 5             | -1.499870 | -0.865950 | 0.000000 |
| 5             | 1.499870  | -0.865950 | 0.000000 |
| 5             | 1.499870  | 0.865950  | 0.000000 |
| 5             | 0.000000  | -1.731901 | 0.000000 |
| 5             | 1.431709  | -2.479793 | 0.000000 |
| 5             | 0.000000  | -3.362056 | 0.000000 |
| 5             | -1.499870 | 0.865950  | 0.000000 |
| 5             | 2.911626  | 1.681028  | 0.000000 |
| 5             | 2.863418  | 0.000000  | 0.000000 |
| 5             | 0.000000  | 3.362056  | 0.000000 |
| 5             | 1.431709  | 2.479793  | 0.000000 |
| 5             | -1.431709 | -2.479793 | 0.000000 |
| 5             | -2.911626 | -1.681028 | 0.000000 |
| 5             | -2.911626 | 1.681028  | 0.000000 |
| 5             | -1.431709 | 2.479793  | 0.000000 |
| 5             | -2.863418 | 0.000000  | 0.000000 |
| 1             | 3.935010  | -2.271879 | 0.000000 |
| 1             | -3.935010 | 2.271879  | 0.000000 |
| 1             | -3.935010 | -2.271879 | 0.000000 |
| 1             | 3.935010  | 2.271879  | 0.000000 |
| 1             | 0.000000  | 4.543758  | 0.000000 |
| 1             | 0.000000  | -4.543758 | 0.000000 |

**Fig.3S** AdNDP bonding patterns obtained for  $D_{3h}$   $B_{18}H_3^-$  (**6**),  $D_{2h}$   $B_{18}H_4$  (**8**),  $C_{2v}$   $B_{18}H_5^+$  (**c**), and  $D_{6h}$   $B_{18}H_6^{2+}$  (**12**) (d) at B3LYP/6-31G.

(a).  $D_{3h}$   $B_{18}H_3^-$

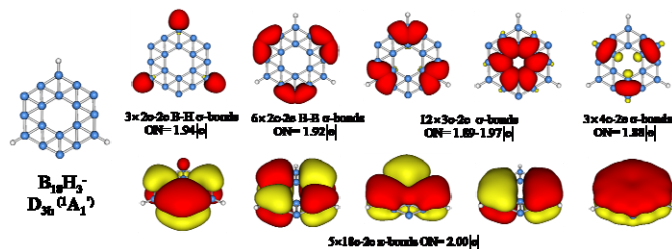

(b).  $C_s$   $B_{18}H_3^-$

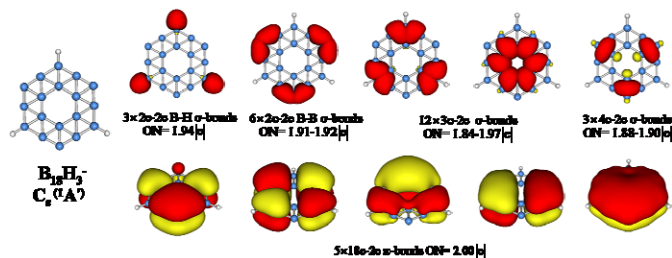

(c).  $D_{2h}$   $B_{18}H_4$

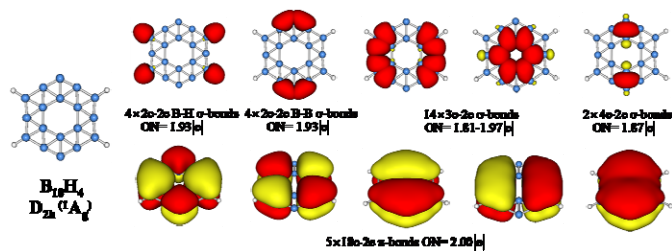

(d).  $C_{2v}$   $B_{18}H_5^+$

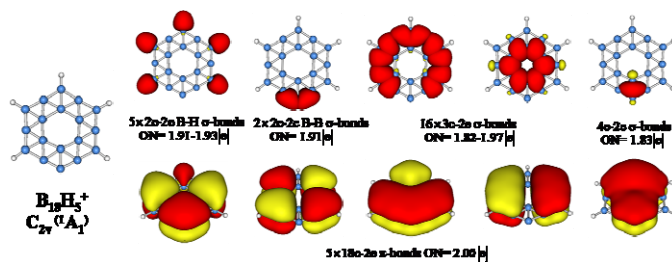

(e).  $D_{6h}$   $B_{18}H_6^{2+}$

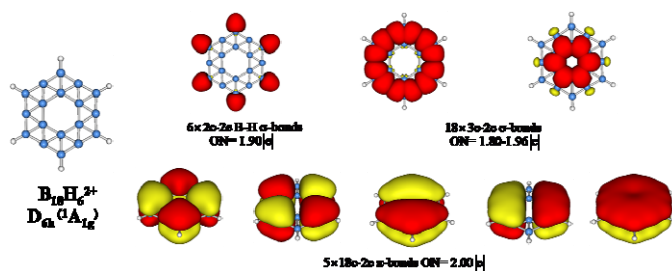

**Fig.4S** Simulated UV spectrum of  $D_{2h}$   $B_{18}H_4$  at TD-B3LYP

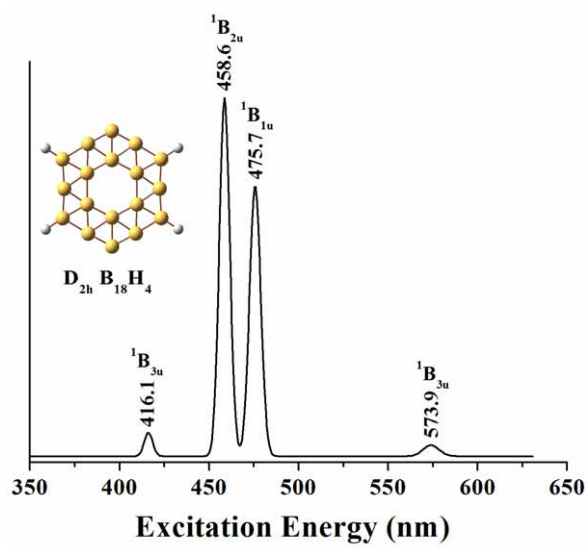

**Table 1S**  $\text{NICS}_{zz}(0)$  and  $\text{NICS}_{zz}(1)$  values calculated for each  $\text{B}_3$  triangle in  $D_{3h}$   $\text{B}_{18}\text{H}_3^-$  (**6**),  $C_s$   $\text{B}_{18}\text{H}_3^-$  (**15**),  $D_{2h}$   $\text{B}_{18}\text{H}_4$  (**8**),  $C_{2v}$   $\text{B}_{18}\text{H}_5^+$  (**10**), and  $D_{6h}$   $\text{B}_{18}\text{H}_6^{2+}$  (**12**) at B3LYP level

|                                                                                                                                         | AMS    | $\text{NICS}_{zz}(0)$ | $\text{NICS}_{zz}(1)$ |
|-----------------------------------------------------------------------------------------------------------------------------------------|--------|-----------------------|-----------------------|
| 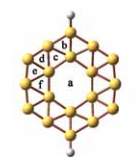<br>$\text{B}_{18}\text{H}_2$<br>$C_{2v} ({}^1A_1)$    | -378.7 | a                     | -55.4                 |
|                                                                                                                                         |        | b                     | -52.0                 |
|                                                                                                                                         |        | c                     | -71.0                 |
|                                                                                                                                         |        | d                     | -55.0                 |
|                                                                                                                                         |        | e                     | -51.8                 |
|                                                                                                                                         |        | f                     | -100.5                |
| <br>$\text{B}_{18}\text{H}_3^-$<br>$D_{3h} ({}^1A_1)$ | -518.0 | a                     | -30.5                 |
|                                                                                                                                         |        | b                     | -47.7                 |
|                                                                                                                                         |        | c                     | -77.2                 |
|                                                                                                                                         |        | d                     | -60.3                 |
| <br>$\text{B}_{18}\text{H}_3^-$<br>$C_s ({}^1A)$     | -505.9 | a                     | -29.3                 |
|                                                                                                                                         |        | b                     | -47.7                 |
|                                                                                                                                         |        | c                     | -76.0                 |
|                                                                                                                                         |        | d                     | -59.9                 |
|                                                                                                                                         |        | e                     | -60.4                 |
|                                                                                                                                         |        | f                     | -77.0                 |
|                                                                                                                                         |        | g                     | -48.4                 |
|                                                                                                                                         |        | h                     | -48.8                 |
|                                                                                                                                         |        | i                     | -76.3                 |
|                                                                                                                                         |        | j                     | -59.9                 |
| <br>$\text{B}_{18}\text{H}_4$<br>$D_{2h} ({}^1A_g)$  | -450.5 | a                     | -6.6                  |
|                                                                                                                                         |        | b                     | -57.4                 |
|                                                                                                                                         |        | c                     | -74.8                 |
|                                                                                                                                         |        | d                     | -55.7                 |
|                                                                                                                                         |        | e                     | -51.9                 |
|                                                                                                                                         |        | f                     | -80.2                 |

|                                                                                                                              | AMS      | NICS <sub>zz</sub> (0) | NICS <sub>zz</sub> (1) |       |
|------------------------------------------------------------------------------------------------------------------------------|----------|------------------------|------------------------|-------|
| <br>$B_{18}H_5^+$<br>$C_{2v} (^1A_1)$       |          | -14.1                  | -30.9                  |       |
|                                                                                                                              | <b>a</b> |                        | -14.1                  | -30.9 |
|                                                                                                                              | <b>b</b> |                        | -55.6                  | -31.9 |
|                                                                                                                              | <b>c</b> |                        | -79.0                  | -45.4 |
|                                                                                                                              | <b>d</b> |                        | -53.6                  | -31.2 |
|                                                                                                                              | <b>e</b> | -433.0                 | -56.7                  | -33.2 |
|                                                                                                                              | <b>f</b> |                        | -79.7                  | -47.8 |
|                                                                                                                              | <b>g</b> |                        | -49.1                  | -33.0 |
|                                                                                                                              | <b>h</b> |                        | -58.5                  | -33.6 |
|                                                                                                                              | <b>i</b> |                        | -72.9                  | -50.2 |
| <b>j</b>                                                                                                                     |          | -55.0                  | -33.0                  |       |
| <br>$B_{18}H_6^{2+}$<br>$D_{6h} (^1A_{1g})$ |          | -20.2                  | -32.5                  |       |
|                                                                                                                              | <b>a</b> |                        | -20.2                  | -32.5 |
|                                                                                                                              | <b>b</b> | -403.3                 | -55.9                  | -30.9 |
| <b>c</b>                                                                                                                     |          | -77.6                  | -45.0                  |       |
